# Supplementary material
Source: PubMed Central journal article supplement (PMC3901045)
Supplement: NIHMS546813-supplement-ESI.pdf [file NIHMS546813-supplement-ESI.pdf]

## High-Throughput Metabolic Genotoxicity Screening with a Fluidic Microwell Chip and Electrochemiluminescence

Dhanuka P. Wasalathanthri,<sup>a</sup> Spundana Malla,<sup>a</sup> Itti Bist,<sup>a</sup> Chi K. Tang,<sup>a</sup> Ronaldo C. Faria,<sup>a,b</sup> and James F. Rusling<sup>a,c,d,\*</sup>

<sup>a</sup> *Department of Chemistry, University of Connecticut, Storrs, Connecticut 06269, United States*

<sup>b</sup> *Departamento de Química, Universidade Federal de São Carlos, São Carlos, SP, Brazil*

<sup>c</sup> *National University of Ireland at Galway, Ireland*

<sup>d</sup> *Department of Cell Biology, University of Connecticut Health Center, Farmington, Connecticut 06032, United States*

*\*Correspondence should be addressed to J.F.R. ([james.rusling@uconn.edu](mailto:james.rusling@uconn.edu))*

### Chemicals

Benzo[a]pyrene (B[a]P,  $M_w = 252.31$ ), poly(diallyldimethylammonium chloride) (PDDA, average  $M_w = 100,000$ - $200,000$ ), poly(sodium 4-styrenesulfonate) (PSS, average  $M_w = 70000$ ), calf thymus DNA (Type I), horse heart myoglobin (Mb,  $MW = 17400$ ) and all other chemicals were from Sigma. Pooled male human liver microsomes (HLM,  $20 \text{ mg mL}^{-1}$  in  $250 \text{ mM}$  sucrose) contained (a)  $20 \text{ mg mL}^{-1}$  total protein content, (b) total cyt P450 content of  $340 \text{ pmol mg}^{-1}$  of protein using the method of Omura and Sato,<sup>1</sup> pooled male rat liver microsomes (RLM,  $20 \text{ mg mL}^{-1}$  in  $250 \text{ mM}$  sucrose) contained (a)  $20 \text{ mg mL}^{-1}$  total protein content, (b) total cyt P450 content of  $590 \text{ pmol mg}^{-1}$  of protein using the method of Omura and Sato, human microsomal epoxide hydrolase (EH),  $10 \text{ mg/mL}$  in  $100 \text{ mM}$  potassium phosphate buffer of pH 7.4; pooled human liver s9 (Hs9)  $20.0 \text{ mg/mL}$  in  $150 \text{ mM}$  KCl,  $50 \text{ mM}$  Tris-HCl +  $2.0 \text{ mM}$  EDTA; baculovirus-insect cell expressed cyt P450 1B1 supersomes (cyt P450 1B1),  $4.5 \text{ mg/mL}$  in  $100 \text{ mM}$  potassium phosphate buffer of pH 7.4 with representative total cyt P450 content of  $220 \text{ pmol mg}^{-1}$  of protein; baculovirus-insect cell expressed cyt P450 1A1 supersomes (cyt P450 1A1),  $5.0 \text{ mg/mL}$  in  $100 \text{ mM}$  potassium phosphate buffer of pH 7.4 with representative total cyt P450 content of  $120 \text{ pmol mg}^{-1}$  of protein; baculovirus-insect cell expressed cyt P450 1A2 supersomes (cyt P450 1A2),  $5.0 \text{ mg/mL}$  in  $100 \text{ mM}$  potassium phosphate buffer of pH 7.4 with representative total cyt P450 content of  $200 \text{ pmol mg}^{-1}$  of protein; and control supersomes were from BD Gentest (Woburn, MA). Furaflavine ( $M_w = 260.25$ ).

### Microfluidic set up fabrication; Metabolite generation and measurements

The silicone rubber microfluidic channel was placed on the micro-well printed electrode array chip, where Ru<sup>II</sup>PVP/DNA/enzyme films were already constructed. This assembly was supported by PMMA plates machined to fit on either side of the silicone gasket, and bolted together tightly to provide a sealed microfluidic channel. The device connected to a dual syringe pump (55-3333, Harvard Inc.) via a 4-way switching valve (v101D, IDEX Inc.) was then placed inside G:Box

Chemi imaging work station (Syngene Inc.) equipped for ECL signal acquisition. The switching valve was used to direct wash buffer and B[a]P substrate solution in to the device as necessary (Fig. S1, SI†).

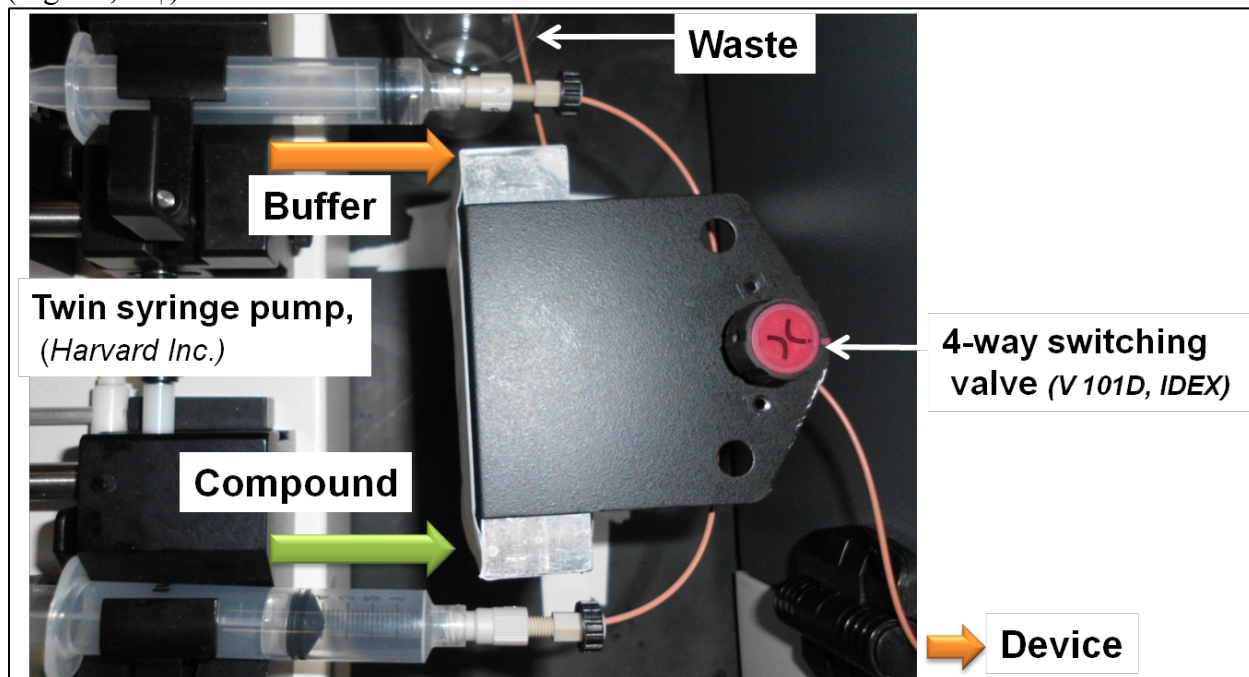

**Fig. S1** Fluidic pumping system equipped with twin syringe pump and 4-way switching valve, which was used to direct wash buffer and B[a]P substrate solution into the device as necessary.

#### DNA-metabolite structure elucidation by CapLC-MS/MS

20  $\mu\text{L}$  of magnetic particles (20  $\text{mg mL}^{-1}$ ) was dispersed in 80  $\mu\text{L}$  of 5 mM Tris buffer (pH 7.0, 5 mM NaCl). 100  $\mu\text{L}$  PDDA was added dropwisely followed by a 20-min incubation to coat the negative charged surface with positively charged polyions. After incubation PDDA coated magnetic particles were pulled towards the side of the tube by placing a magnet and the supernatant was discarded. The particles were washed twice with Tris buffer to remove loosely bound polyions and redispersed in 100  $\mu\text{L}$  of Tris buffer. In a similar fashion 40  $\mu\text{L}$  of cyt P450 1B1 supersomes and DNA were incorporated with 30 min incubation for each to yield the final film architecture of PDDA/cyt P450 1B1/PDDA/DNA on magnetic beads. These magnetic particle bioreactors were dispersed in 10 mM phosphate buffer (pH 7.4) to a final volume of 200  $\mu\text{L}$  and stored at  $\sim 0^\circ\text{C}$  till use. 200  $\mu\text{L}$  of magnetic bead bio colloidal suspension in 10 mM phosphate buffer (pH 7.4) was incubated with 25  $\mu\text{M}$  B[a]P for 4 hours in the presence of NADPH regeneration system (10 mM glucose 6-phosphate, 4 units of glucose-6-phosphate dehydrogenase, 10 mM  $\text{MgCl}_2$ , 0.80 mM  $\text{NADP}^+$ ) at  $37^\circ\text{C}$  for metabolite generation and DNA adduct formation. After the reaction, particles were washed three times in Tris buffer to remove any unreacted B[a]P and redispersed in 100  $\mu\text{L}$  Tris buffer. DNA in the reactors was enzymatically hydrolyzed by incubating with an enzyme system consists of deoxyribonuclease I (400 unit  $\text{mg}^{-1}$  of DNA), phosphodiesterase I from snake venom (0.2 unit  $\text{mg}^{-1}$  of DNA), phosphodiesterase II (0.01 unit  $\text{mg}^{-1}$  of DNA), nuclease P1 (5 units  $\text{mg}^{-1}$  DNA), 10  $\mu\text{L}$  of 10 mM  $\text{MgCl}_2$ , and phosphatase alkaline (1.2 unit  $\text{mg}^{-1}$  of DNA), for 12 h at  $37^\circ\text{C}$ . Supernatant which contains DNA-metabolite adducts was separated from magnetic particle bioreactors and vacuum

filtered before CapLC-MS/MS analysis. A 10  $\mu\text{L}$  of sample was loaded to on a C18 trap column (Atlantis dC18 110A C18, 20.0 mm, 0.5 mm i.d., 5  $\mu\text{m}$  particle size, Phenomenex, Torrance, CA) and flushed at a flow rate of 10  $\mu\text{L min}^{-1}$  with ammonium acetate buffer (10 mM, pH 4.5 with 0.1% formic acid) to eliminate the residual salt and most of the unmodified bases. After 2 min, the adducts were back-flushed to the analytical column (Atlantis dC18, 150 mm, 0.3 mm i.d., 5  $\mu\text{m}$  particle size, Waters) and separated using a binary separation gradient composed of ammonium acetate buffer (A) (10 mM, pH 4.5 with 0.1% formic acid) and acetonitrile with 0.05% formic acid (B), with the following acetonitrile composition.

| Time, min | A % | B%  | Flow rate, $\mu\text{L min}^{-1}$ |
|-----------|-----|-----|-----------------------------------|
| 0         | 80  | 20  | 5                                 |
| 20        | 80  | 20  | 5                                 |
| 30        | 35  | 65  | 5                                 |
| 40        | 35  | 65  | 5                                 |
| 50        | 00  | 100 | 5                                 |
| 60        | 00  | 100 | 5                                 |
| 65        | 80  | 20  | 5                                 |
| 70        | 80  | 20  | 5                                 |

A 4000 QTRAP (AB Sciex, Foster City, CA) mass spectrometer with Analyst 1.4 software was operated in the positive ion mode. Multiple reactions monitoring (MRM) and enhanced product ion (EPI) modes were conducted at 5500 V ion spray voltage, auxiliary gas flow rate setting 30, sweep gas flow rate setting 20, capillary temperature 200  $^{\circ}\text{C}$  and declustering potential was 60 V with collision energy of 35 eV.

## Results

### Film fabrication and characterization

#### *Film characterization.*

A quartz crystal microbalance (QCM, USI Japan) was used to monitor the LbL assembly of the film on 9 MHz QCM resonators (AT-cut, International Crystal Mfg.), where a negatively charged monolayer was constructed on gold ( $0.16(\pm 0.01)\text{cm}^2$ ) by incubating the resonators in 0.5 mM 3-Mercaptopropionic acid in ethanol overnight. The adsorption conditions and stability of each layer was optimized and frequency change ( $\Delta F$ ) was measured after washing with deionized water (D.I. water) and drying over a stream of nitrogen. The mass per unit area  $M/A$  ( $\text{g cm}^{-2}$ ) in each layer and the nominal thickness are directly related to  $\Delta F$ , and mass and nominal thickness were determined from  $\Delta F$  by using established equations from the literature.<sup>2</sup>

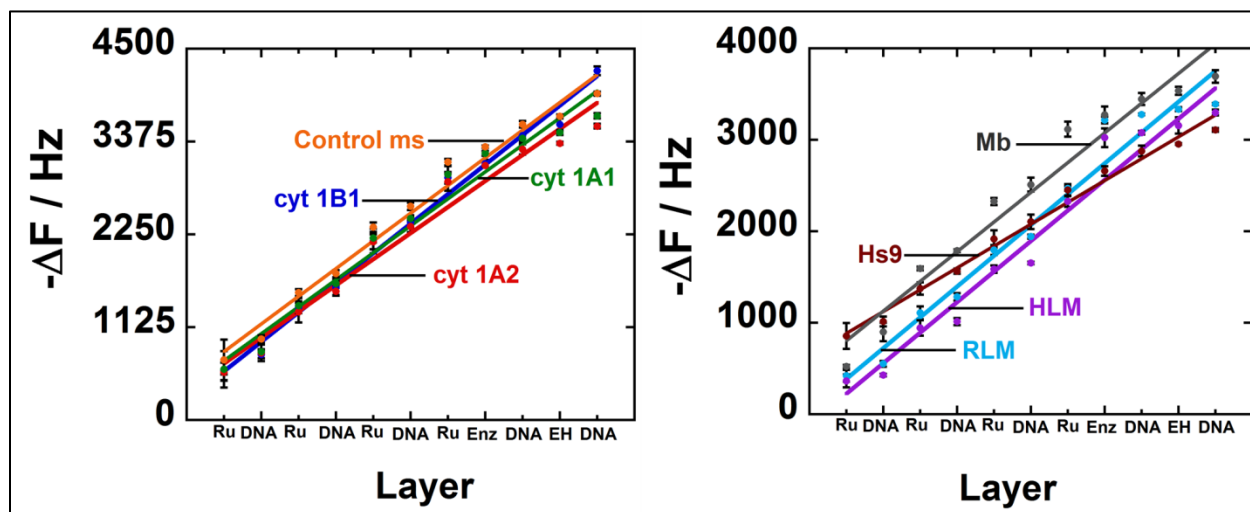

**Fig. S2** QCM frequency changes as a function of the number of adsorbed layers during the film growth. Error bars reflect SD for 3 resonators. Ru - Ru<sup>II</sup>PVP, Enz- cyt P450 enzyme source, and EH- epoxide hydrolase.

**Table S1** Characteristics of the films; film assembly denoted by cyt P450 enzyme source.

| Film assembly                                                                   | Cyt P450 1B1   | Cyt P450 1A2  | Cyt P450 1A1  | Control supersomes | Mb            | HLM            | Hs9            | RLM            |
|---------------------------------------------------------------------------------|----------------|---------------|---------------|--------------------|---------------|----------------|----------------|----------------|
| Nominal thickness / nm                                                          | 55             | 54            | 56            | 59                 | 56            | 53             | 47             | 54             |
| Mass density of RuPVP / $\mu\text{g cm}^{-2}$                                   | 10.3 $\pm$ 0.9 | 9.1 $\pm$ 0.7 | 9.3 $\pm$ 0.9 | 9.8 $\pm$ 0.6      | 9.7 $\pm$ 0.3 | 11.6 $\pm$ 0.6 | 10.5 $\pm$ 0.5 | 11.1 $\pm$ 0.3 |
| Mass density of DNA / $\mu\text{g cm}^{-2}$                                     | 4.4 $\pm$ 0.2  | 4.4 $\pm$ 0.8 | 4.5 $\pm$ 0.4 | 5.2 $\pm$ 0.7      | 4.5 $\pm$ 0.6 | 2.2 $\pm$ 0.4  | 4.9 $\pm$ 0.2  | 3.1 $\pm$ 0.6  |
| Mass density of cyt P450 source / $\mu\text{g cm}^{-2}$                         | 0.7 $\pm$ 0.5  | 0.8 $\pm$ 0.6 | 1.0 $\pm$ 0.7 | 0.8 $\pm$ 0.5      | 0.6 $\pm$ 0.5 | 3.8 $\pm$ 0.5  | 1.2 $\pm$ 0.5  | 4.1 $\pm$ 0.2  |
| Mass density of EH / $\mu\text{g cm}^{-2}$                                      | 0.5 $\pm$ 0.2  | 0.3 $\pm$ 0.1 | 0.3 $\pm$ 0.1 | 0.4 $\pm$ 0.2      | 0.4 $\pm$ 0.3 | 0.4 $\pm$ 0.4  | 0.4 $\pm$ 0.1  | 0.3 $\pm$ 0.1  |
| Concentration of total cyt P450s <sup>a</sup> / $\text{pmol } \mu\text{g}^{-1}$ | 0.22           | 0.20          | 0.12          | n.d.               | n.d.          | 0.34           | 0.31           | 0.59           |

a – source, BD biosciences Inc., n.d. – not detectable.

## Reproducibility

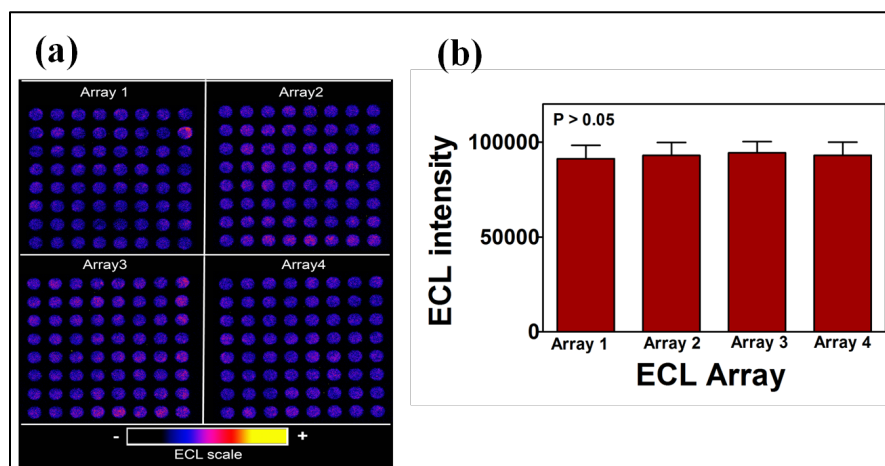

**Fig. S3** Chip-chip reproducibility of (Ru<sup>II</sup>PVP/DNA)<sub>3</sub> films in microwells of four different PG chips; (a) reconstructed ECL images. (b) variation of average ECL intensity of four chips. One way analysis of variance showed that ECL intensity did not differ at  $p > 0.05$ .

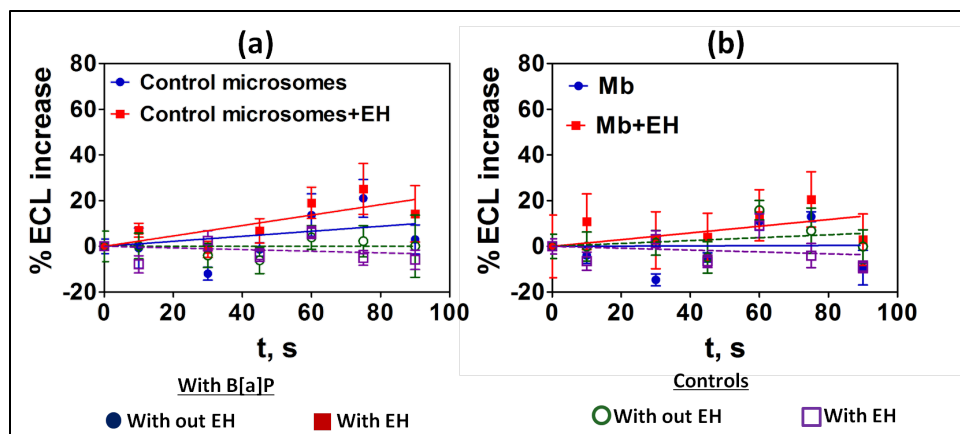

**Fig. S4** Influence of enzyme reaction time on ECL increase for fluidic sensor chips exposed to 25  $\mu$ M B[a]P at pH 7.4, (a) control supersomes (cyt P450 free), (b) Mb. Error bars represent standard deviations for n=4.

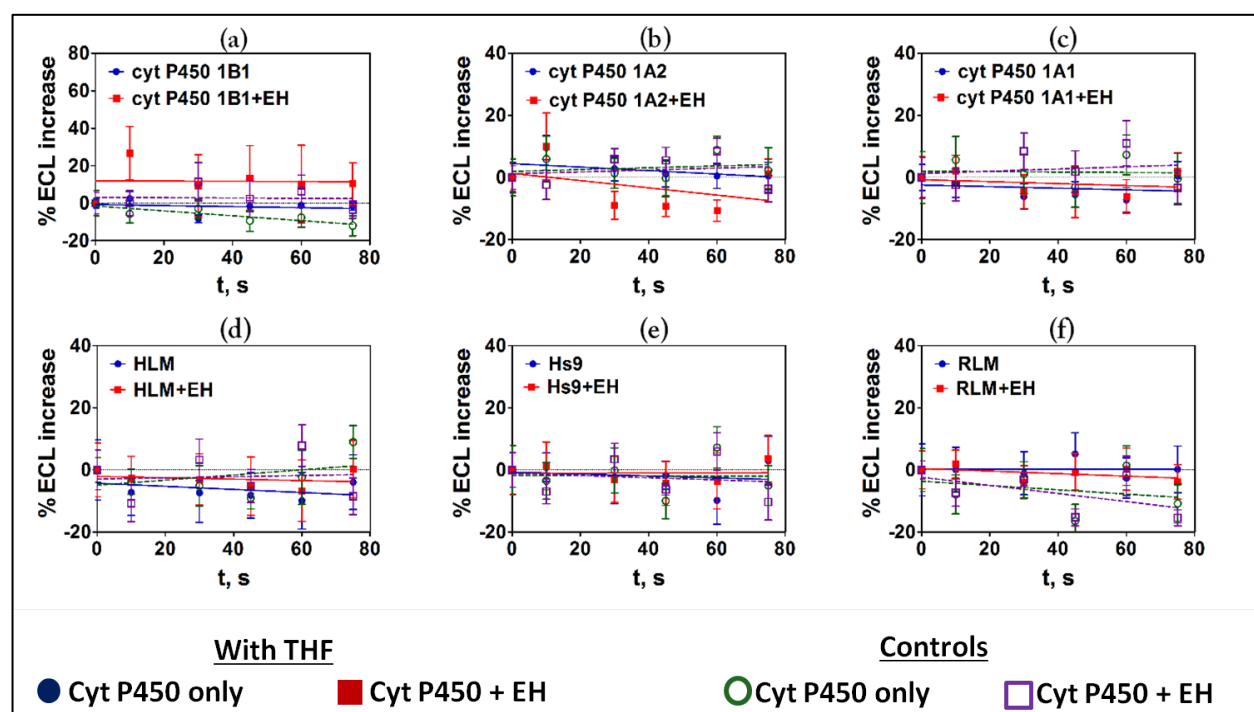

**Fig. S5** Influence of enzyme reaction time on ECL increase for fluidic sensor chips exposed to 25  $\mu$ M tetrahydrofuran (THF) at pH 7.4 with electronic activation of cyt P450s, (a) cyt P450 1B1, (b) cyt P450 1A2, (c) cyt P450 1A1, (d) HLM, (e) Hs9, (f) RLM. Controls are without substrate or with substrate but without electronic activation of cyt P450s, which gave equivalent results. Error bars represent standard deviations for n=4.

## Inhibition

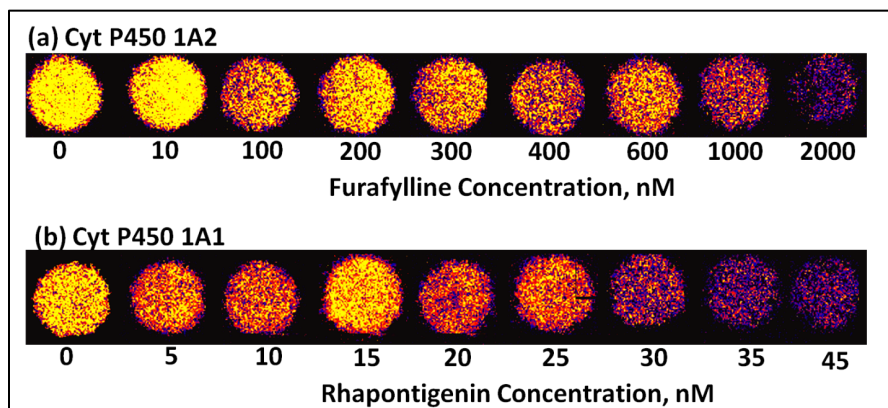

**Fig. S6** (a) Reconstructed ECL images of Ru<sup>II</sup>PVP/DNA and enzyme arrays allowed to react with oxygenated 25  $\mu$ M of B[a]P+1% DMSO in pH = 7.4 phosphate buffer for 30 sec with different concentrations of (a)furafylline (b) rhapontigenin.

## Voltammetry of cyt P450s

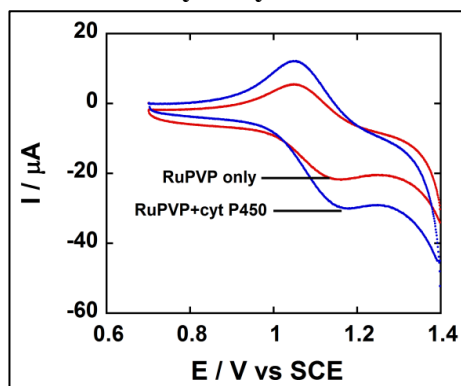

**Figure S7** Cyclic voltammograms of film containing only Ru<sup>II</sup>PVP and Ru<sup>II</sup>PVP+cyt P450 1A2 on PG electrodes acquired in pH = 7.4 buffer at a scan rate of 0.2 V/s.

## References

- 1 R. Sato and T. Omura, *J. Biol. Chem.*, 1964, **239**, 2370-2378.
- 2 Y. Lvov, in *Handbook of Surfaces and Interfaces of Materials*, ed. R. W. Nalwa, Academic Press, San Diego, CA, 2001, Vol. 3, pp 170-189.
